# Supplementary material for: The development of sol–gel derived TiO2 thin films and corresponding memristor architectures
Source: Royal Society of Chemistry journal article supplement (doi:10.1039/c6ra25618j), 2017-01-01
Supplement: c6ra25618j1.pdf [file c6ra25618j1.pdf]

## Supporting information

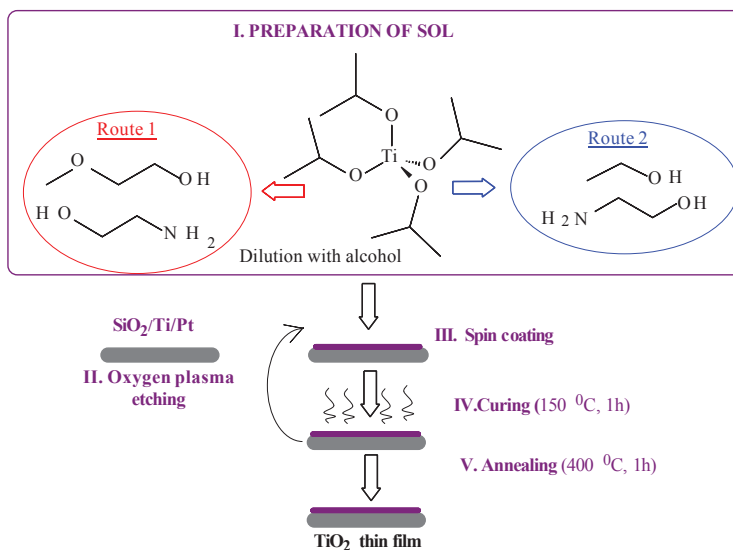

Fig. S1. Key steps of TiO<sub>2</sub> thin films preparation.

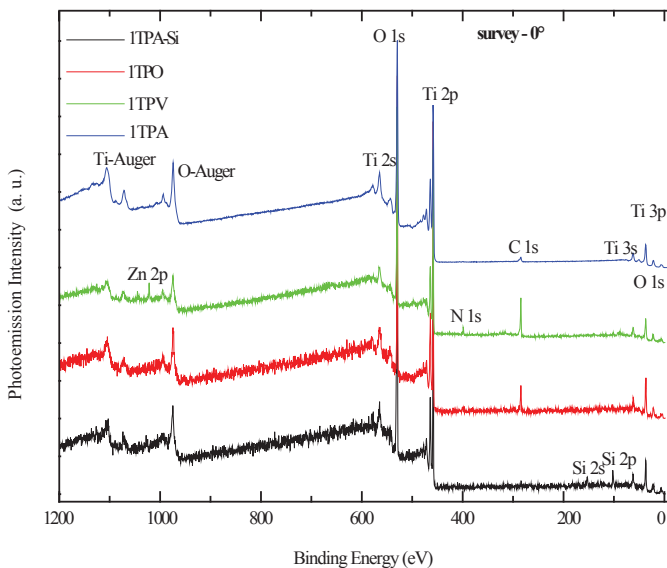

Fig. S2. Surveys of TiO<sub>2</sub> samples annealed in air (ITPA), oxygen (ITPO), vacuum (ITPV), and Si-contaminated oven (ITPA-Si).

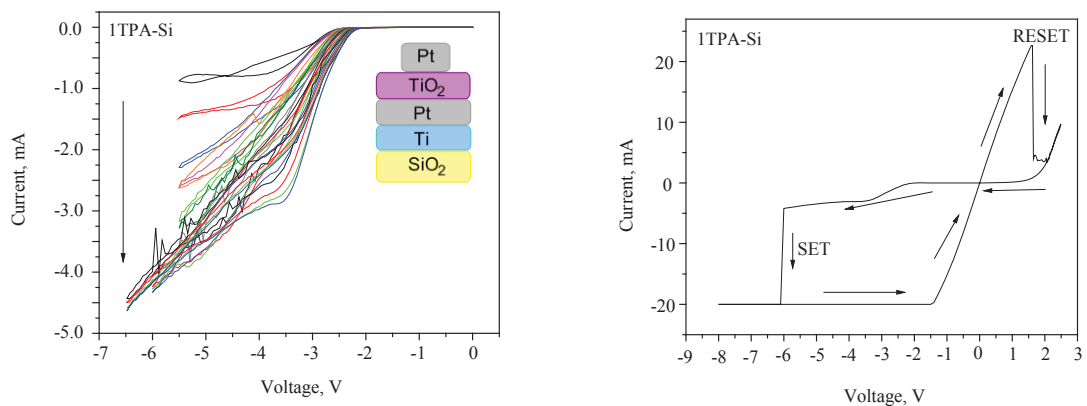

**Fig. S3.** Gradual electroforming of ITPA-Si with a compliance current of 20 mA and 60 s sweeps (left). First SET (20 mA compliance current, 60 s) and RESET (30 mA compliance current, 60 s) of ITPA-Si (right).

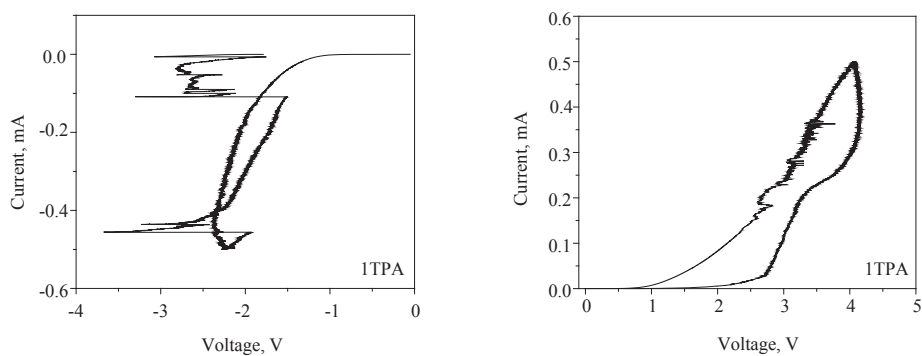

**Fig. S4.** Current-controlled electroforming of ITPA with Pt top dish electrode,  $\pm 500 \mu\text{A}$  sweep with 100 nA step and a compliance current of 15 V.

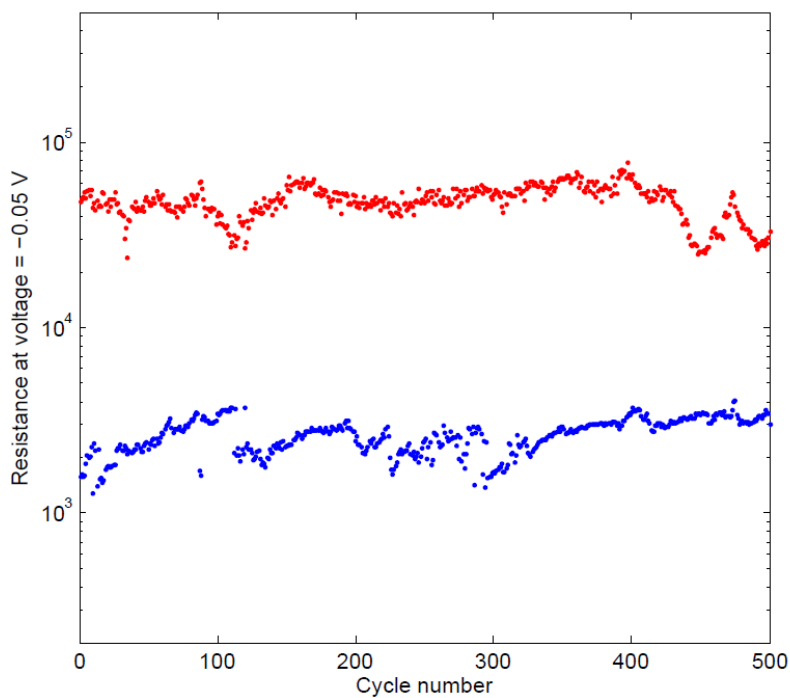

**Fig. S5.** Endurance of ITPA with Pt top dish electrode.
